# Supplementary material
Source: PubMed Central journal article supplement (PMC7938666)

Data Supplement for Holleran et al., The Relationship Between White Matter Microstructure and General Cognitive Ability in Patients With Schizophrenia and Healthy Participants in the ENIGMA Consortium. Am J Psychiatry (doi: 10.1176/appi.ajp.2019.19030225)

## **SUPPLEMENTARY MATERIAL**

### **TABLES**

**Table S1.** DTI acquisition protocols for contributing ENIGMA-Schizophrenia working group site

**Table S2.** List of white matter tracts included in the principal component analysis to derive a single latent component for global fractional anisotropy (gFA) and six long association tracts (LA-gFA).

**Table S3.** Total percent variance explained for gFA and LA-gFA first un-rotated principal component

**Table S4.** Demographic data collected from 11 collaborating ENIGMA-Schizophrenia DTI working group

**Table S5.** gFA meta-analysis results using a random effects model.

**Table S6.** LAgFA meta-analysis results using a random effects model.

**Table S7.** Pearson's correlation coefficient for gFA and LA-gFA components. cc=correlation coefficient.

**Table S8.** Leave-one-out meta-analysis for gFA.

**Table S9.** Leave-one-out meta-analysis for LAgFA.

**Table S10.** Meta-analysis results for gFA and IQ in males & females.

**Table S11.** Meta-analysis results for LAgFA and IQ in males & females.

**Table S12.** Meta-analysis results for secondary diffusion MRI parameters.

**Table S13.** Per-Site Regression Standardized Beta Coefficients for secondary diffusion MRI parameters.

### **FIGURES**

**Figure S1.** Sex dependent meta-analysis results for **(A)** gFA and **(B)** LAgFA. There was no significant difference in the observed Hedges' *g* effect size for gFA between males (ES=0.35, CI=0.23-0.48) and females (ES=0.39, CI=0.22-0.55),  $\chi^2(1)=0.09$   $p=0.77$ . Similarly for LAgFA there was no significant difference in the observed Hedges' *g* effect size for males (ES=0.33, CI=0.21-0.46) and females (ES=0.37, CI=0.20-0.53),  $\chi^2(1)=0.11$   $p=0.74$ .

| Study cohort  | Scanner          | Field Strength | Acquisitions | Voxel Size and Slice thickness (mm) | Gradient directions and b-value (mm/s <sup>2</sup> ) | b=0 scans |
|---------------|------------------|----------------|--------------|-------------------------------------|------------------------------------------------------|-----------|
| <b>ASRB 1</b> | Siemens Avanto   | 1.5T           | 1            | 2.4x2.4x2.4                         | 64 at b                                              | 1         |
| <b>ASRB 2</b> | Siemens Avanto   | 1.5T           | 1            | 2.4x2.4x2.4                         | 64 at b                                              | 1         |
| <b>ASRB 3</b> | Siemens Avanto   | 1.5T           | 1            | 2.4x2.4x2.4                         | 64 at b                                              | 1         |
| <b>ASRB 4</b> | Siemens Avanto   | 1.5T           | 1            | 2.4x2.4x2.4                         | 64 at b                                              | 1         |
| <b>ASRB 5</b> | Siemens Avanto   | 1.5T           | 1            | 2.4x2.4x2.4                         | 64 at b                                              | 1         |
| <b>EDIN</b>   | Siemens          | 3T             | 1            | 2.2x2.5x2.5                         | 56 at                                                | 6         |
| <b>Dublin</b> | Philips Achieva  | 3T             | 1            | 2x2x2.3                             | 15 at b=800                                          | 1         |
| <b>Galway</b> | Siemens          | 1.5T           | 1            | 2.5x2.5x2.5                         | 64 at                                                | 7         |
| <b>HUBIN</b>  | GE               | 3T             | 1            | 0.94 x 0.94                         | 60 at                                                | 10        |
| <b>MPRC</b>   | Siemens Allegra  | 3T             | 1            | 1.7x1.7x4.0                         | 12 at                                                | 8         |
| <b>TOP</b>    | GE               | 3T             | 1            | 2x2x2.5                             | 30 at                                                | 1         |
| <b>MCIC 1</b> | Siemens Sonata   | 1.5T           | 1            | 2x2x2                               | 12 at                                                | 1         |
| <b>MCIC 2</b> | Siemens Trio     | 3T             | 1            | 2x2x2                               | 6 at b=1000                                          | 1         |
| <b>MCIC 3</b> | Siemens Trio     | 3T             | 1            | 2x2x2                               | 12 at                                                | 1         |
| <b>MCIC 4</b> | Siemens Sonata   | 1.5T           | 1            | 2x2x2                               | 60 at b=700                                          | 1         |
| <b>COBRE</b>  | Siemens TIM Trio | 3T             | 2            | 2x2x2                               | 30 at b=800                                          | 5         |
| <b>Madrid</b> | Philips Intera   | 1.5T           | 1            | 1.75x1.75x2                         | 15 at b=800                                          | 1         |
| <b>Madrid</b> | Philips Intera   | 1.5T           | 2            | 2x2x2                               | 32 at b=800                                          | 1         |
| <b>Madrid</b> | Philips Intera   | 1.5T           | 1            | 2x2x2                               | 64 at                                                | 1         |
| <b>Oxford</b> | Siemens Sonata   | 1.5T           | 3            | 2.5x2.5x2.5                         | 60 at                                                | 5         |

**TABLE S1.** DTI acquisition protocols for contributing ENIGMA-Schizophrenia working group site. **ASRB**=Australian Schizophrenia Research Bank, **EDIN**=Edinburgh, **HUBIN**=Human Brain Informatics, **MPRC**=Maryland Psychiatric Research Center, **MCIC**=MIND Clinical Imaging Consortium, **COBRE**=Center for Biomedical Research Excellence.

| Abbreviation | White Matter Tract                     |
|--------------|----------------------------------------|
| Avg-FA       | Average FA                             |
| GCC          | Genu of Corpus Callosum                |
| BCC          | Body of Corpus Callosum                |
| SCC          | Splenium of Corpus Callosum            |
| FX           | Fornix                                 |
| ALIC         | Anterior Limb of the Internal Capsule* |
| IC           | Internal Capsule                       |
| CC           | Corpus Callosum                        |
| ACR          | Arcuate Fasciculus*                    |
| SCR          | Superior Corona Radiata                |
| PCR          | Posterior Corona Radiata               |
| CR           | Corona Radiata                         |
| PTR          | Posterior Thalamic Radiation           |
| SS           | Sagittal stratum                       |
| EC           | External capsule                       |
| CGC          | Cingulum (cingulate gyrus)*            |
| SLF          | Superior Longitudinal Fasciculus*      |
| SFO          | Superior Fronto-Occipital Fasciculus   |
| FX-ST        | Fornix/Stria Terminalis                |
| IFO          | Inferior Fronto Occipital Fasciculus*  |
| UNC          | Uncinate Fasciculus*                   |

**TABLE S2.** The 19 white matter tracts which were reported in Kelly et al to have significantly reduced FA in patients with schizophrenia compared to controls. The ENIGMA-DTI protocol outputs average FA for each bilateral white matter tract. The present analysis combined FA from both hemispheres for the tracts listed above to avoid any potential issues of left/right flipping. gFA was computed using a principal component analysis of the tracts listed above. \* identifies tracts used to generate LA-gFA.

| ENIGMA Site   | PCA total % Variance Explained |               |
|---------------|--------------------------------|---------------|
|               | <i>gFA</i>                     | <i>LA-gFA</i> |
| ASRB-1        | 58                             | 49            |
| ASRB-2        | 55                             | 51            |
| ASRB-3        | 57                             | 52            |
| ASRB-4        | 56                             | 51            |
| ASRB-5        | 50                             | 44            |
| EDIN          | 61                             | 57            |
| Dublin        | 52                             | 46            |
| Galway        | 63                             | 64            |
| HUBIN         | 48                             | 50            |
| MPRC          | 67                             | 67            |
| TOP           | 44                             | 43            |
| MCIC          | 52                             | 42            |
| COBRE         | 58                             | 57            |
| Madrid        | 55                             | 54            |
| Oxford        | 70                             | 67            |
| <b>Median</b> | <b>56</b>                      | <b>51</b>     |
| <b>Range</b>  | <b>44-70</b>                   | <b>42-67</b>  |

**TABLE S3.** Total percent variance explained for the first unrotated component representing global fractional anisotropy (*gFA*) and the first unrotated component representing six long association tracts fractional anisotropy (*LA-gFA*).

|        |         | <i>sample size</i> |            | <i>Mean Age</i> |            | <i>Mean IQ</i> |           |
|--------|---------|--------------------|------------|-----------------|------------|----------------|-----------|
|        |         | <i>HC</i>          | <i>SZ</i>  | <i>st. dev</i>  |            | <i>st. dev</i> |           |
|        |         | <b>HC</b>          | <b>SZ</b>  | <b>HC</b>       | <b>SZ</b>  | <b>HC</b>      | <b>SZ</b> |
| ASRB1  | Male    | 16                 | 89         | 40              | 39         | 118            | 100       |
|        | Female  | 17                 | 32         | 14.1            | 10.9       | 11             | 17        |
| ASRB2  | Male    | 41                 | 54         | 41              | 38         | 115            | 105       |
|        | Female  | 38                 | 31         | 13.8            | 10.4       | 11             | 13        |
| ASRB3  | Male    | 9                  | 12         | 44              | 42         | 113            | 112       |
|        | Female  | 9                  | 5          | 13.6            | 8.7        | 12             | 12        |
| ASRB4  | Male    | 15                 | 28         | 37              | 39         | 120            | 101       |
|        | Female  | 14                 | 11         | 13.7            | 10.4       | 8              | 17        |
| ASRB5  | Male    | 18                 | 42         | 40              | 40         | 118            | 105       |
|        | Female  | 20                 | 22         | 13.9            | 10.4       | 13             | 14        |
| Edin   | Male    | 19                 | 17         | 37              | 35         | 116            | 105       |
|        | Female  | 17                 | 11         | 15.2            | 10.1       | 11             | 16        |
| Dublin | males   | 27                 | 22         | 35              | 44         | 118            | 91        |
|        | females | 33                 | 6          | 12.1            | 11.1       | 16             | 14        |
| Galway | males   |                    | 20         |                 | 34         |                | 92        |
|        | females |                    | 5          |                 | 11.1       |                | 21        |
| HUBIN  | male    | 20                 | 22         | 54              | 52         | 104            | 88        |
|        | female  | 12                 | 5          | 8.96            | 7.5        | 18             | 18        |
| MPRC   | male    | 26                 | 21         | 39              | 37         | 99             | 91        |
|        | female  | 46                 | 10         | 14.3            | 12.5       | 18             | 15        |
| TOP    | male    | 137                | 18         | 32              | 29         | 113            | 97        |
|        | female  | 99                 | 11         | 7.6             | 8.4        | 11             | 15        |
| MCIC   | males   | 72                 | 69         | 31              | 33         | 115            | 98        |
|        | females | 41                 | 26         | 10.9            | 11.4       | 14             | 19        |
| COBRE  | males   | 62                 | 72         | 39              | 39         | 111            | 99        |
|        | females | 22                 | 22         | 11.9            | 13.8       | 13             | 17        |
| Madrid | male    | 53                 | 31         | 13              | 17         | 111            | 80        |
|        | female  | 31                 | 10         | 4.3             | 3.3        | 15             | 25        |
| Oxford | males   | 24                 | 18         | 13              | 14         | 109            | 91        |
|        | females | 19                 | 18         | 1.2             | 1.4        | 13             | 15        |
|        |         | <b>957</b>         | <b>760</b> | <b>36</b>       | <b>36</b>  | <b>113</b>     | <b>97</b> |
|        |         |                    |            | <b>10.1</b>     | <b>9.1</b> | <b>6</b>       | <b>8</b>  |

**Table S4.** Demographic data collected from 11 collaborating ENIGMA-Schizophrenia DTI working group. The final sample size consisted of 1049 healthy participants and 798 patients with schizophrenia. \*indicates sites with data from adolescent participants. **ASRB**=Australian Schizophrenia Research Bank, **EDIN**=Edinburgh, **HUBIN**=Human Brain Informatics, **MPRC**=Maryland Psychiatric Research Center, **MCIC**=MIND Clinical Imaging Consortium, **COBRE**= Center for Biomedical Research Excellence.

|                | Site           | n           | Hedge's g   | CI Lower    | CI Upper         | p                | Z           |
|----------------|----------------|-------------|-------------|-------------|------------------|------------------|-------------|
| HC             | ASRB-1         | 33          | 0.14        | -0.58       | 0.86             | 0.71             | 0.38        |
|                | ASRB-2         | 79          | 0.32        | -0.13       | 0.78             | 0.16             | 1.39        |
|                | ASRB-3         | 18          | 0.12        | -0.89       | 1.13             | 0.82             | 0.23        |
|                | ASRB-4         | 29          | 0.28        | -0.49       | 1.06             | 0.47             | 0.72        |
|                | ASRB-5         | 38          | 0.28        | -0.39       | 0.95             | 0.41             | 0.82        |
|                | EDIN           | 36          | 0.21        | -0.48       | 0.89             | 0.56             | 0.59        |
|                | Dublin         | 60          | 0.00        | -0.52       | 0.52             | 1.00             | 0.00        |
|                | HUBIN          | 32          | 0.09        | -0.64       | 0.82             | 0.81             | 0.23        |
|                | MCPR           | 72          | 0.39        | -0.09       | 0.87             | 0.11             | 1.60        |
|                | TOP            | 236         | 0.38        | 0.12        | 0.64             | 0.00             | 2.85        |
|                | MCIC           | 113         | 0.48        | 0.10        | 0.87             | 0.01             | 2.47        |
|                | COBRE          | 84          | 0.40        | -0.05       | 0.84             | 0.08             | 1.76        |
|                | Madrid         | 84          | 0.32        | -0.12       | 0.76             | 0.15             | 1.44        |
|                | Oxford         | 43          | 0.18        | -0.45       | 0.80             | 0.58             | 0.55        |
|                | <b>HC mean</b> | <b>957</b>  | <b>0.32</b> | <b>0.18</b> | <b>0.45</b>      | <b>&lt;0.001</b> | <b>4.72</b> |
| SZ             | ASRB-1         | 121         | 0.23        | -0.14       | 0.59             | 0.22             | 1.23        |
|                | ASRB-2         | 85          | 0.04        | -0.40       | 0.47             | 0.87             | 0.16        |
|                | ASRB-3         | 17          | 0.31        | -0.75       | 1.37             | 0.57             | 0.57        |
|                | ASRB-4         | 39          | 0.20        | -0.46       | 0.85             | 0.56             | 0.59        |
|                | ASRB-5         | 64          | 0.34        | -0.17       | 0.84             | 0.20             | 1.29        |
|                | EDIN           | 28          | 1.57        | 0.55        | 2.58             | 0.00             | 3.02        |
|                | Dublin         | 28          | 0.30        | -0.50       | 1.09             | 0.46             | 0.74        |
|                | Galway         | 25          | 0.36        | -0.49       | 1.21             | 0.40             | 0.83        |
|                | HUBIN          | 27          | 0.17        | -0.63       | 0.98             | 0.67             | 0.42        |
|                | MCPR           | 31          | 0.11        | -0.64       | 0.85             | 0.78             | 0.28        |
|                | TOP            | 29          | 0.28        | -0.50       | 1.05             | 0.48             | 0.70        |
|                | MCIC           | 95          | 0.11        | -0.30       | 0.52             | 0.60             | 0.52        |
|                | COBRE          | 94          | 0.13        | -0.29       | 0.54             | 0.55             | 0.60        |
|                | Madrid         | 41          | 0.11        | -0.53       | 0.74             | 0.74             | 0.33        |
|                | Oxford         | 36          | 0.06        | -0.62       | 0.75             | 0.86             | 0.18        |
| <b>SZ mean</b> | <b>760</b>     | <b>0.20</b> | <b>0.05</b> | <b>0.35</b> | <b>&lt;0.01</b>  | <b>2.66</b>      |             |
| <b>Overall</b> | <b>1717</b>    | <b>0.27</b> | <b>0.17</b> | <b>0.36</b> | <b>&lt;0.001</b> | <b>5.29</b>      |             |

**TABLE S5.** gFA meta-analysis results using a random effects model. gFA accounted for a significant amount of variance in IQ in the full sample (average Hedges' g ES=0.27), healthy participant (ES=0.32) and patient (ES=0.20) groups. HC=healthy control, SZ=patients with schizophrenia, CI=95% confidence intervals.

|                | Site           | n              | Hedge's g   | CI Lower    | CI Upper    | p                 | Z                 |
|----------------|----------------|----------------|-------------|-------------|-------------|-------------------|-------------------|
| HC             | ASRB-1         | 33             | 0.04        | -0.66       | 0.74        | 0.91              | 0.11              |
|                | ASRB-2         | 79             | 0.46        | 0.01        | 0.92        | 0.05              | 1.99              |
|                | ASRB-3         | 18             | 0.18        | -0.79       | 1.15        | 0.71              | 0.37              |
|                | ASRB-4         | 29             | 0.06        | -0.69       | 0.81        | 0.87              | 0.16              |
|                | ASRB-5         | 38             | 0.19        | -0.47       | 0.84        | 0.57              | 0.56              |
|                | EDIN           | 36             | 0.06        | -0.61       | 0.73        | 0.86              | 0.18              |
|                | Dublin         | 60             | 0.21        | -0.31       | 0.72        | 0.43              | 0.79              |
|                | HUBIN          | 32             | 0.94        | 0.15        | 1.73        | 0.02              | 2.34              |
|                | MCPR           | 72             | 0.18        | -0.29       | 0.65        | 0.46              | 0.74              |
|                | TOP            | 236            | 0.37        | 0.11        | 0.63        | 0.00              | 2.81              |
|                | MCIC           | 113            | 0.48        | 0.10        | 0.87        | 0.01              | 2.49              |
|                | COBRE          | 84             | 0.35        | -0.08       | 0.79        | 0.11              | 1.58              |
|                | Madrid         | 84             | 0.13        | -0.31       | 0.56        | 0.57              | 0.57              |
|                | Oxford         | 43             | 0.22        | -0.39       | 0.83        | 0.49              | 0.70              |
|                |                | <b>HC mean</b> | <b>957</b>  | <b>0.31</b> | <b>0.18</b> | <b>0.44</b>       | <b>&lt;0.0001</b> |
| SZ             | ASRB-1         | 121            | 0.38        | 0.02        | 0.75        | 0.04              | 2.06              |
|                | ASRB-2         | 85             | 0.01        | -0.42       | 0.44        | 0.97              | 0.04              |
|                | ASRB-3         | 17             | 0.23        | -0.77       | 1.24        | 0.65              | 0.46              |
|                | ASRB-4         | 39             | 0.18        | -0.47       | 0.82        | 0.59              | 0.54              |
|                | ASRB-5         | 64             | 0.09        | -0.41       | 0.58        | 0.73              | 0.35              |
|                | EDIN           | 28             | 1.58        | 0.60        | 2.56        | 0.00              | 3.16              |
|                | Dublin         | 28             | 0.21        | -0.56       | 0.97        | 0.60              | 0.53              |
|                | Galway         | 25             | 0.12        | -0.69       | 0.93        | 0.77              | 0.30              |
|                | HUBIN          | 27             | 0.19        | -0.59       | 0.96        | 0.64              | 0.47              |
|                | MCPR           | 31             | 0.54        | -0.21       | 1.29        | 0.16              | 1.42              |
|                | TOP            | 29             | 0.00        | -0.75       | 0.75        | 1.00              | 0.00              |
|                | MCIC           | 95             | 0.34        | -0.07       | 0.75        | 0.10              | 1.63              |
|                | COBRE          | 94             | 0.06        | -0.34       | 0.47        | 0.76              | 0.31              |
|                | Madrid         | 41             | 0.35        | -0.28       | 0.98        | 0.28              | 1.08              |
|                | Oxford         | 36             | 0.11        | -0.56       | 0.78        | 0.75              | 0.32              |
|                | <b>SZ mean</b> | <b>760</b>     | <b>0.23</b> | <b>0.09</b> | <b>0.38</b> | <b>&lt;0.0001</b> | <b>3.13</b>       |
| <b>Overall</b> |                | <b>1717</b>    | <b>0.28</b> | <b>0.18</b> | <b>0.37</b> | <b>&lt;0.0001</b> | <b>5.56</b>       |

**TABLE S6.** LAgFA meta-analysis results using a random effects model. LA-gFA accounted for a significant amount of variance in IQ in the full sample (average Hedges' g ES=0.28), healthy participant (ES=0.31) and patient (ES=0.23) groups. HC=healthy control, SZ=patients with schizophrenia, CI=95% confidence intervals.

| <b>ENIGMA Site</b> | <b>gFA - LA-gFA cc</b> |
|--------------------|------------------------|
| ASRB-1             | 0.95                   |
| ASRB-2             | 0.96                   |
| ASRB-3             | 0.96                   |
| ASRB-4             | 0.95                   |
| ASRB-5             | 0.93                   |
| EDIN               | 0.95                   |
| Dublin             | 0.93                   |
| Galway             | 0.96                   |
| HUBIN              | 0.95                   |
| MPRC               | 0.96                   |
| TOP                | 0.92                   |
| MCIC               | 0.91                   |
| COBRE              | 0.97                   |
| Madrid             | 0.96                   |
| Oxford             | 0.98                   |
| <b>Median</b>      | <b>0.95</b>            |
| <b>Range</b>       | <b>0.91-0.98</b>       |

**TABLE S7.** Pearson's correlation coefficient for gFA and LA-gFA components. cc=correlation coefficient.



|                | Omitted Site   | Mean        | CI Lower    | CI Upper         | p                | z            |
|----------------|----------------|-------------|-------------|------------------|------------------|--------------|
| HC             | ASRB           | 0.30        | 0.17        | 0.42             | <0.001           | 4.75         |
|                | Cobre          | 0.28        | 0.16        | 0.39             | <0.001           | 4.73         |
|                | Dublin         | 0.34        | 0.22        | 0.45             | <0.001           | 5.55         |
|                | EDIN           | 0.29        | 0.18        | 0.40             | <0.001           | 5.12         |
|                | Galway         | 0.29        | 0.18        | 0.40             | <0.001           | 5.15         |
|                | HUBIN          | 0.30        | 0.19        | 0.41             | <0.001           | 5.19         |
|                | Madrid         | 0.29        | 0.17        | 0.40             | <0.001           | 4.88         |
|                | MCIC           | 0.27        | 0.15        | 0.38             | <0.001           | 4.49         |
|                | MCPR           | 0.28        | 0.17        | 0.40             | <0.001           | 4.85         |
|                | Oxford         | 0.29        | 0.18        | 0.40             | <0.001           | 5.14         |
|                | Top            | 0.26        | 0.14        | 0.39             | <0.001           | 4.10         |
|                | <b>HC mean</b> | <b>0.29</b> | <b>0.25</b> | <b>0.32</b>      | <b>&lt;0.001</b> | <b>16.28</b> |
| SZ             | ASRB           | 0.21        | 0.04        | 0.37             | <0.01            | 2.43         |
|                | Cobre          | 0.21        | 0.08        | 0.35             | <0.01            | 3.08         |
|                | Dublin         | 0.20        | 0.06        | 0.33             | <0.01            | 2.92         |
|                | EDIN           | 0.18        | 0.05        | 0.30             | <0.01            | 2.67         |
|                | Galway         | 0.20        | 0.07        | 0.33             | <0.01            | 3.00         |
|                | HUBIN          | 0.20        | 0.07        | 0.33             | <0.01            | 3.07         |
|                | Madrid         | 0.21        | 0.08        | 0.34             | <0.01            | 3.13         |
|                | MCIC           | 0.22        | 0.08        | 0.35             | <0.01            | 3.12         |
|                | MCPR           | 0.21        | 0.08        | 0.34             | <0.01            | 3.12         |
|                | Oxford         | 0.21        | 0.08        | 0.34             | <0.01            | 3.16         |
|                | Top            | 0.20        | 0.07        | 0.33             | <0.01            | 3.03         |
|                | <b>SZ mean</b> | <b>0.20</b> | <b>0.16</b> | <b>0.24</b>      | <b>&lt;0.001</b> | <b>9.88</b>  |
| <b>Overall</b> | <b>0.25</b>    | <b>0.23</b> | <b>0.28</b> | <b>&lt;0.001</b> | <b>18.78</b>     |              |

**TABLE S8.** Leave-one-out meta-analysis for gFA. For each meta-analysis iteration a single site was omitted to determine if significant findings were driven by a single site. The leave-one-out analysis indicates that for each site omitted the results remain significant with the mean Hedges' g ES=0.25 for the full sample, ES=0.20 for patients, and ES=0.29 for healthy participants,  $p<0.001$ . HC=healthy control, SZ=patients with schizophrenia, CI=95% confidence intervals.

|                | Omitted Site | Mean           | CI Lower    | CI Upper    | p                | z                |
|----------------|--------------|----------------|-------------|-------------|------------------|------------------|
| HC             | ASRB         | 0.32           | 0.20        | 0.44        | <0.001           | 5.20             |
|                | Cobre        | 0.31           | 0.19        | 0.42        | <0.001           | 5.29             |
|                | Dublin       | 0.33           | 0.21        | 0.44        | <0.001           | 5.40             |
|                | EDIN         | 0.32           | 0.21        | 0.43        | <0.001           | 5.60             |
|                | Galway       | 0.31           | 0.20        | 0.42        | <0.001           | 5.55             |
|                | HUBIN        | 0.29           | 0.17        | 0.40        | <0.001           | 5.04             |
|                | Madrid       | 0.33           | 0.21        | 0.44        | <0.001           | 5.61             |
|                | MCIC         | 0.29           | 0.17        | 0.40        | <0.001           | 4.88             |
|                | MCPR         | 0.32           | 0.21        | 0.43        | <0.001           | 5.53             |
|                | Oxford       | 0.31           | 0.20        | 0.42        | <0.001           | 5.50             |
|                | TOP          | 0.29           | 0.17        | 0.41        | <0.001           | 4.58             |
|                |              | <b>HC mean</b> | <b>0.31</b> | <b>0.27</b> | <b>0.34</b>      | <b>&lt;0.001</b> |
| SZ             | ASRB         | 0.26           | 0.09        | 0.43        | <0.001           | 2.96             |
|                | Cobre        | 0.25           | 0.12        | 0.39        | <0.001           | 3.67             |
|                | Dublin       | 0.23           | 0.10        | 0.36        | <0.001           | 3.47             |
|                | EDIN         | 0.20           | 0.07        | 0.33        | <0.001           | 3.08             |
|                | Galway       | 0.23           | 0.10        | 0.36        | <0.001           | 3.57             |
|                | HUBIN        | 0.23           | 0.10        | 0.36        | <0.001           | 3.53             |
|                | Madrid       | 0.22           | 0.09        | 0.35        | <0.001           | 3.38             |
|                | MCIC         | 0.21           | 0.08        | 0.35        | <0.001           | 3.11             |
|                | MCPR         | 0.22           | 0.09        | 0.35        | <0.001           | 3.37             |
|                | Oxford       | 0.24           | 0.11        | 0.37        | <0.001           | 3.58             |
|                | TOP          | 0.24           | 0.11        | 0.37        | <0.001           | 3.64             |
|                |              | <b>SZ mean</b> | <b>0.23</b> | <b>0.19</b> | <b>0.27</b>      | <b>&lt;0.001</b> |
| <b>Overall</b> |              | <b>0.27</b>    | <b>0.25</b> | <b>0.30</b> | <b>&lt;0.001</b> | <b>20.64</b>     |

**TABLE S9.** Leave-one-out meta-analysis for LAgFA. For each meta-analysis iteration a single site was omitted to determine if significant findings were driven by a single site. The leave-one-out analysis indicates that for each site omitted the results remain significant with the mean Hedges' g ES=0.27 for the full sample, ES=0.23 for patients, and ES=0.31 for healthy participants,  $p<0.001$ . HC=healthy control, SZ=patients with schizophrenia, CI=95% confidence intervals.

|                | Site   | Hedge's g   | CI Lower    | CI Upper    | p                | z                |
|----------------|--------|-------------|-------------|-------------|------------------|------------------|
| Female         | ASRB-1 | 0.52        | -0.08       | 1.12        | 0.09             | 1.71             |
|                | ASRB-2 | 0.21        | -0.28       | 0.69        | 0.40             | 0.84             |
|                | ASRB-3 | 0.27        | -0.93       | 1.46        | 0.66             | 0.44             |
|                | ASRB-4 | 0.00        | -0.84       | 0.84        | 1.00             | 0.00             |
|                | ASRB-5 | 0.45        | -0.19       | 1.10        | 0.17             | 1.37             |
|                | EDIN   | 0.26        | -0.60       | 1.12        | 0.55             | 0.59             |
|                | Dublin | 0.06        | -0.59       | 0.72        | 0.85             | 0.19             |
|                | HUBIN  | 1.00        | -2.52       | 4.52        | 0.58             | 0.56             |
|                | MCPR   | 0.32        | -0.74       | 1.39        | 0.55             | 0.59             |
|                | TOP    | 0.17        | -0.37       | 0.71        | 0.55             | 0.60             |
|                | MCIC   | 0.73        | 0.33        | 1.13        | <0.001           | 3.54             |
|                | COBRE  | 0.95        | 0.41        | 1.50        | <0.001           | 3.43             |
|                | Madrid | 0.21        | -0.41       | 0.82        | 0.51             | 0.66             |
|                | Oxford | 0.12        | -0.51       | 0.76        | 0.70             | 0.38             |
|                | Oxford | 0.22        | -0.45       | 0.90        | 0.52             | 0.65             |
|                |        | <b>mean</b> | <b>0.39</b> | <b>0.22</b> | <b>0.55</b>      | <b>&lt;0.001</b> |
| Male           | ASRB-1 | 0.32        | -0.08       | 0.71        | 0.11             | 1.58             |
|                | ASRB-2 | 0.29        | -0.12       | 0.70        | 0.17             | 1.38             |
|                | ASRB-3 | 0.12        | -0.80       | 1.05        | 0.80             | 0.26             |
|                | ASRB-4 | 0.09        | -0.53       | 0.71        | 0.78             | 0.28             |
|                | ASRB-5 | 0.30        | -0.23       | 0.82        | 0.27             | 1.10             |
|                | EDIN   | 0.93        | 0.15        | 1.71        | 0.02             | 2.32             |
|                | Dublin | 0.11        | -0.47       | 0.69        | 0.71             | 0.37             |
|                | Galway | 0.14        | -0.82       | 1.09        | 0.78             | 0.28             |
|                | HUBIN  | 0.53        | -0.12       | 1.18        | 0.11             | 1.60             |
|                | MCPR   | 1.03        | 0.36        | 1.70        | 0.00             | 3.01             |
|                | TOP    | 0.28        | -0.04       | 0.60        | 0.09             | 1.69             |
|                | MCIC   | 0.53        | 0.18        | 0.87        | <0.01            | 3.00             |
|                | COBRE  | 0.40        | 0.05        | 0.74        | 0.03             | 2.22             |
|                | Madrid | 0.20        | -0.24       | 0.64        | 0.37             | 0.89             |
|                | Oxford | 0.23        | -0.40       | 0.87        | 0.47             | 0.72             |
|                |        | <b>mean</b> | <b>0.35</b> | <b>0.23</b> | <b>0.48</b>      | <b>&lt;0.001</b> |
| <b>Overall</b> |        | <b>0.37</b> | <b>0.27</b> | <b>0.47</b> | <b>&lt;0.001</b> | <b>7.20</b>      |

**TABLE S10.** Meta-analysis results for gFA and IQ in males & females. There was no significant difference in the observed Hedges' g effect size for males (ES=0.35, CI=0.23-0.48) and females (ES=0.39, CI=0.22-0.55),  $\chi^2(1)=0.09$   $p=0.77$ . CI=95% confidence intervals.

|                | Site        | Hedge's g   | CI Lower    | CI Upper    | p                | z           |
|----------------|-------------|-------------|-------------|-------------|------------------|-------------|
| Female         | ASRB-1      | 0.46        | -0.14       | 1.05        | 0.13             | 1.51        |
|                | ASRB-2      | 0.27        | -0.22       | 0.75        | 0.28             | 1.08        |
|                | ASRB-3      | 0.10        | -1.08       | 1.29        | 0.86             | 0.17        |
|                | ASRB-4      | 0.00        | -0.84       | 0.84        | 1.00             | 0.00        |
|                | ASRB-5      | 0.26        | -0.38       | 0.89        | 0.43             | 0.80        |
|                | EDIN        | 0.25        | -0.62       | 1.11        | 0.58             | 0.56        |
|                | Dublin      | 0.09        | -0.57       | 0.74        | 0.79             | 0.26        |
|                | HUBIN       | 0.82        | -2.47       | 4.11        | 0.63             | 0.49        |
|                | MCPR        | 0.37        | -0.70       | 1.44        | 0.50             | 0.67        |
|                | TOP         | 0.09        | -0.45       | 0.63        | 0.75             | 0.32        |
|                | MCIC        | 0.76        | 0.36        | 1.17        | <0.0001          | 3.67        |
|                | COBRE       | 0.90        | 0.36        | 1.44        | <0.01            | 3.28        |
|                | Madrid      | 0.18        | -0.44       | 0.79        | 0.58             | 0.56        |
|                | Oxford      | 0.28        | -0.36       | 0.92        | 0.39             | 0.85        |
|                | Oxford      | 0.11        | -0.57       | 0.78        | 0.75             | 0.31        |
|                | <b>mean</b> | <b>0.37</b> | <b>0.20</b> | <b>0.53</b> | <b>&lt;0.001</b> | <b>4.37</b> |
| Male           | ASRB-1      | 0.46        | 0.06        | 0.85        | 0.02             | 2.25        |
|                | ASRB-2      | 0.36        | -0.05       | 0.78        | 0.09             | 1.70        |
|                | ASRB-3      | 0.12        | -0.80       | 1.05        | 0.80             | 0.26        |
|                | ASRB-4      | 0.00        | -0.62       | 0.62        | 1.00             | 0.00        |
|                | ASRB-5      | 0.26        | -0.26       | 0.78        | 0.33             | 0.97        |
|                | EDIN        | 0.83        | 0.06        | 1.60        | 0.03             | 2.13        |
|                | Dublin      | 0.15        | -0.43       | 0.73        | 0.61             | 0.51        |
|                | Galway      | 0.06        | -0.89       | 1.01        | 0.90             | 0.13        |
|                | HUBIN       | 0.55        | -0.11       | 1.20        | 0.10             | 1.64        |
|                | MCPR        | 0.99        | 0.33        | 1.66        | <0.01            | 2.93        |
|                | TOP         | 0.21        | -0.11       | 0.53        | 0.20             | 1.29        |
|                | MCIC        | 0.54        | 0.19        | 0.88        | <0.01            | 3.05        |
|                | COBRE       | 0.33        | -0.02       | 0.68        | 0.06             | 1.87        |
|                | Madrid      | 0.00        | -0.44       | 0.44        | 1.00             | 0.00        |
|                | Oxford      | 0.23        | -0.41       | 0.86        | 0.48             | 0.70        |
|                | <b>mean</b> | <b>0.33</b> | <b>0.21</b> | <b>0.46</b> | <b>&lt;0.001</b> | <b>5.23</b> |
| <b>Overall</b> |             | <b>0.35</b> | <b>0.25</b> | <b>0.45</b> | <b>&lt;0.001</b> | <b>6.81</b> |

**TABLE S11.** Meta-analysis results for LAgFA and IQ in males & females. There was no significant difference in the observed Hedges' g effect size for males (ES=0.33, CI=0.21-0.46) and females (ES=0.37, CI=0.20-0.53),  $\chi^2(1)=0.11$   $p=0.74$ . CI=95% confidence intervals.

| DTI parameter | Sample | n   | Hedge's G | CI lower | CI upper | p     |
|---------------|--------|-----|-----------|----------|----------|-------|
| MD            | HC     | 397 | 0.25      | 0.05     | 0.46     | 0.01  |
|               | Sz     | 467 | 0.19      | 0.00     | 0.38     | 0.05  |
|               | All    | 864 | 0.22      | 0.08     | 0.36     | <0.01 |
| RD            | HC     | 397 | 0.37      | 0.02     | 0.72     | 0.04  |
|               | Sz     | 467 | 0.31      | 0.07     | 0.55     | 0.01  |
|               | All    | 864 | 0.33      | 0.13     | 0.52     | <0.01 |
| AD            | HC     | 397 | 0.32      | 0.11     | 0.52     | <0.01 |
|               | Sz     | 467 | 0.07      | -0.12    | 0.25     | 0.47  |
|               | All    | 864 | 0.24      | 0.11     | 0.37     | 0.01  |
| LA-gMD        | HC     | 397 | 0.19      | -0.01    | 0.34     | 0.07  |
|               | Sz     | 467 | 0.09      | -0.09    | 0.28     | 0.33  |
|               | All    | 864 | 0.14      | 0.00     | 0.27     | 0.05  |
| LA-gRD        | HC     | 397 | 0.27      | -0.08    | 0.62     | 0.13  |
|               | Sz     | 467 | 0.42      | 0.04     | 0.80     | 0.03  |
|               | All    | 864 | 0.34      | 0.08     | 0.60     | 0.01  |
| LA-gAD        | HC     | 397 | 0.28      | 0.08     | 0.48     | 0.01  |
|               | Sz     | 467 | 0.14      | -0.05    | 0.32     | 0.15  |
|               | All    | 864 | 0.20      | 0.06     | 0.34     | <0.01 |

**TABLE S12.** Meta-analysis results for secondary diffusion MRI parameters. MD=mean diffusivity, RD=radial diffusivity, AD=axial diffusivity, LA=long association tract analysis. The largest effect sizes were observed for measures relating to radial diffusivity (RD & LA-gRD).

|               | <b>ASRB</b> | <b>EDIN</b> | <b>Dublin</b> | <b>HUBIN</b> | <b>MPRC</b> | <b>Galway</b> |
|---------------|-------------|-------------|---------------|--------------|-------------|---------------|
| <b>gFA</b>    | 0.057       | 0.369       | 0.037         | 0.251        | 0.273       | 0.193         |
| <b>gMD</b>    | -0.053      | -0.106      | -0.221        | -0.344       | -0.01       | -0.173        |
| <b>gRD</b>    | -0.105      | -0.245      | -0.153        | -0.347       | -0.423      | -0.197        |
| <b>gAD</b>    | 0.049       | 0.195       | -0.296        | -0.153       | -0.101      | -0.049        |
| <b>LA-gFA</b> | 0.139       | 0.344       | 0.079         | 0.253        | 0.229       | 0.064         |
| <b>LA-gMD</b> | -0.12       | -0.158      | -0.135        | -0.28        | -0.021      | -0.077        |
| <b>LA-gRD</b> | -0.063      | -0.265      | -0.131        | -0.324       | -0.385      | -0.064        |
| <b>LA-gAD</b> | 0.088       | 0.164       | -0.114        | -0.115       | -0.094      | -0.033        |

**TABLE S13.** Per-Site Regression Standardized Beta Coefficients for secondary diffusion MRI parameters. The standardized Beta's reported here support our findings that higher FA is associated with higher cognitive functions, which is primarily driven by increased radial diffusivity.

**FIGURE S1.** Sex dependent meta-analysis results for (A) gFA and (B) LAgFA. There was no significant difference in the observed Hedges' g effect size for gFA between males (ES=0.35, CI=0.23-0.48) and females (ES=0.39, CI=0.22-0.55),  $\chi^2(1)=0.09$   $p=0.77$ . Similarly for LAgFA there was no significant difference in the observed Hedges' g effect size for males (ES=0.33, CI=0.21-0.46) and females (ES=0.37, CI=0.20-0.53),  $\chi^2(1)=0.11$   $p=0.74$ .

**FIGURE S1A.**

### gFA Females and Males

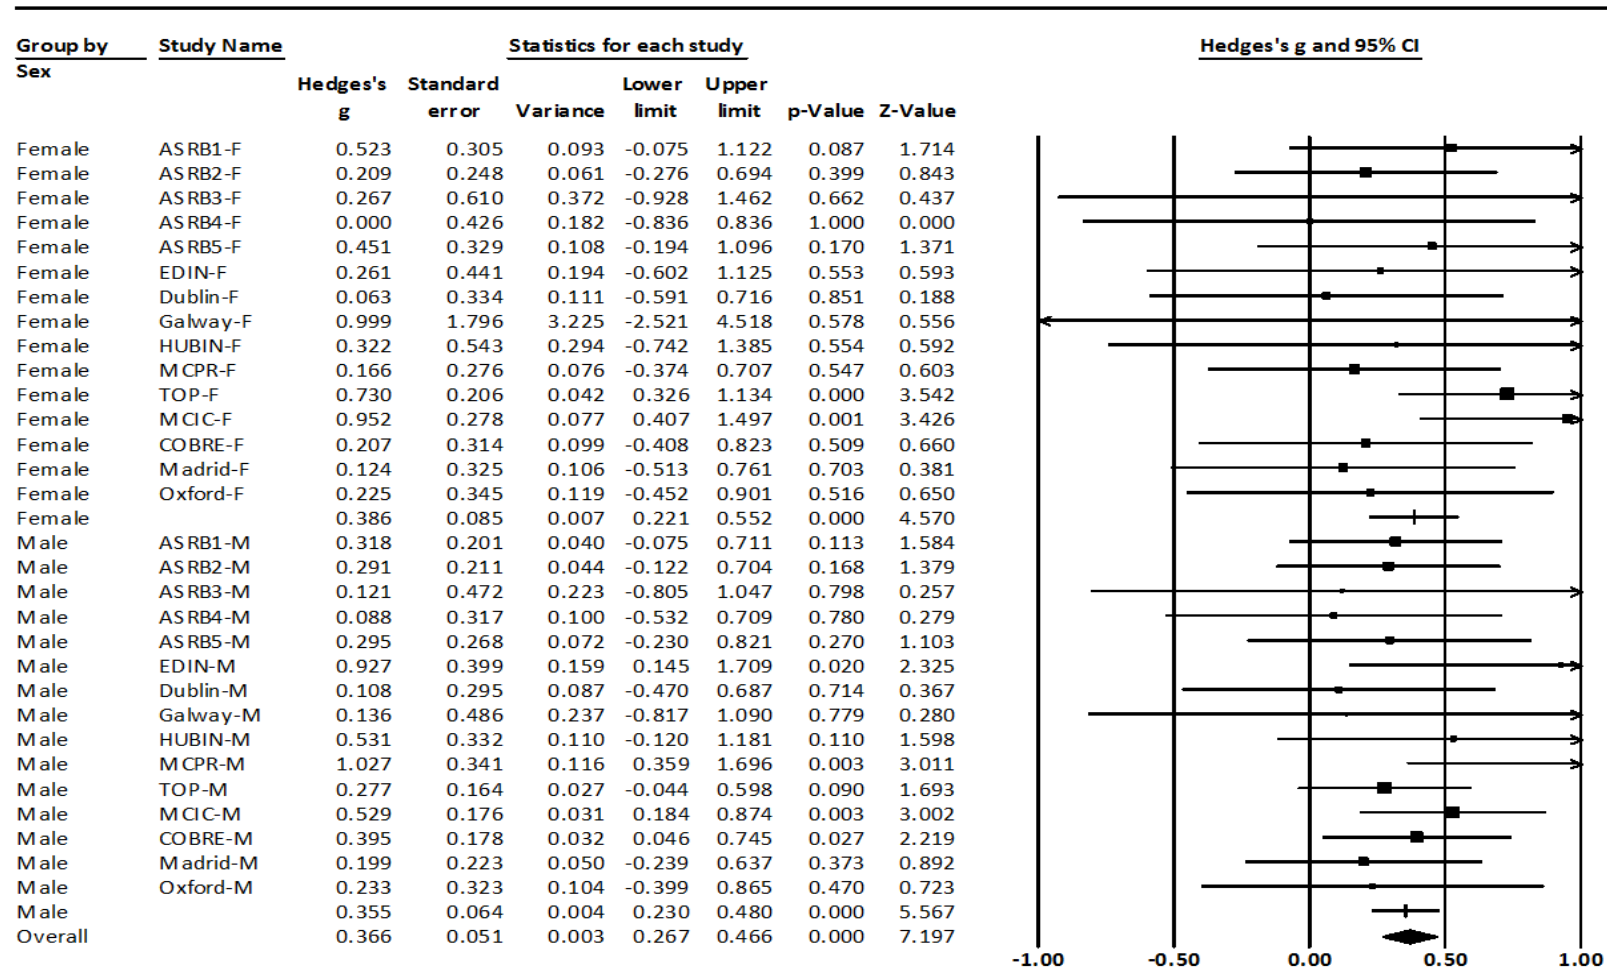

FIGURE S1B.

### LA<sub>g</sub>FA Females and Males

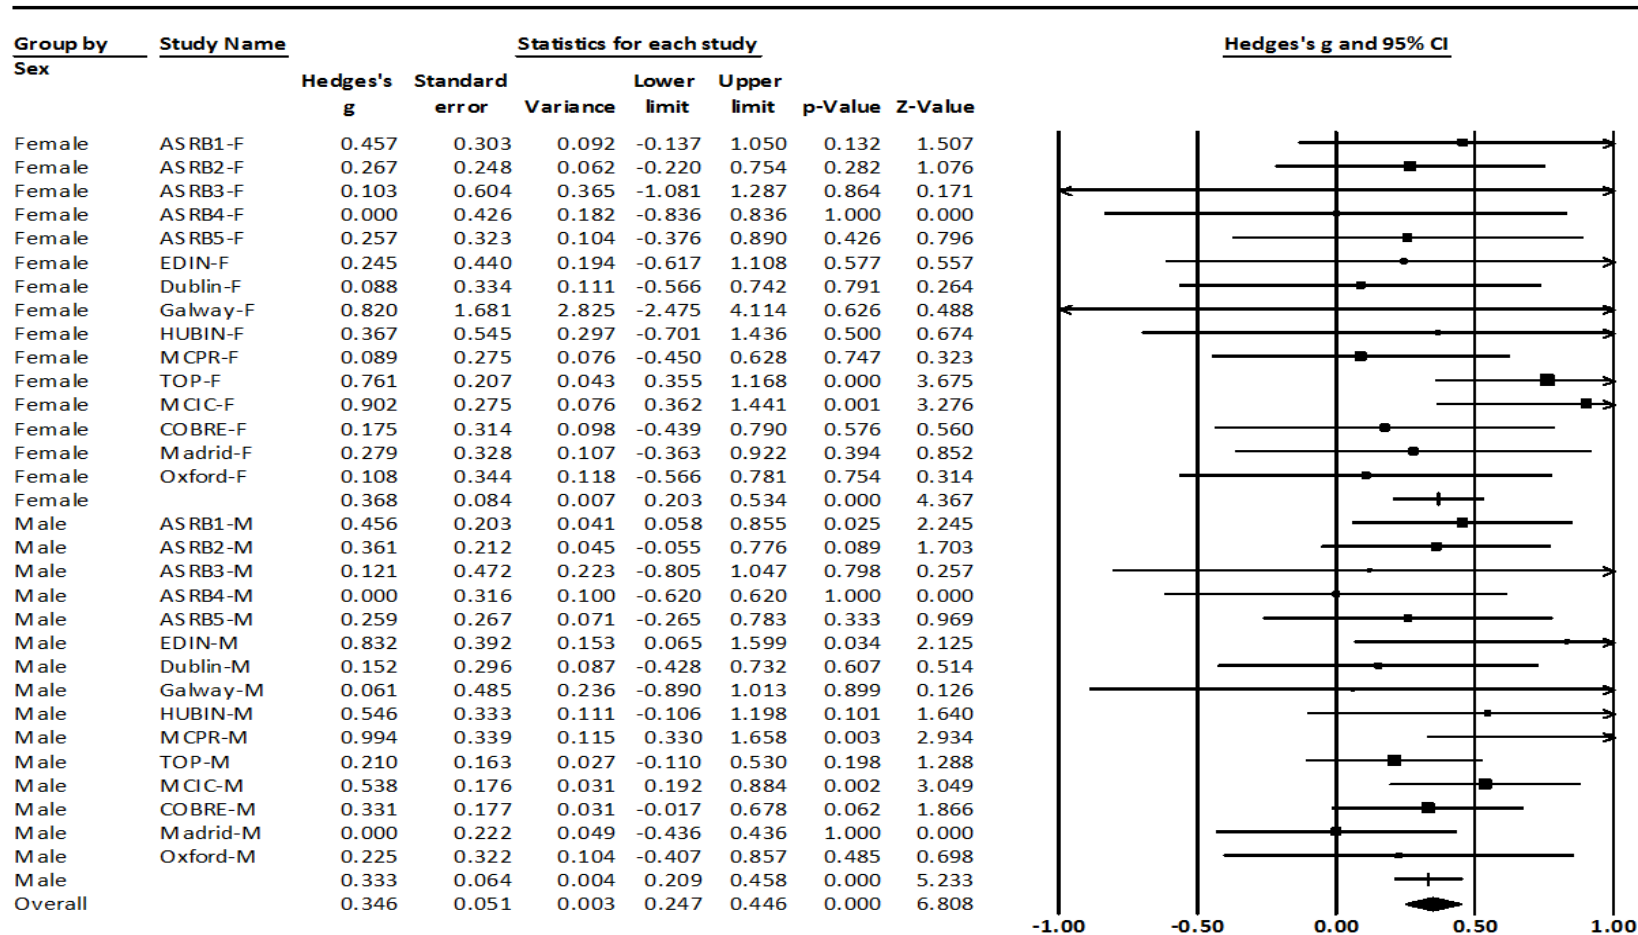

Supplement: NIHMS1671772-supplement-Supp_Material_1.pdf [file NIHMS1671772-supplement-Supp_Material_1.pdf]
